# Supplementary material for: Impact of APOE Genotype on Neurocognition Following Conformal Whole Brain Radiotherapy for Brain Metastases: A Post hoc Analysis of Phase II Randomized Trial
Source: Research Square preprint supplement (doi:10.21203/rs.3.rs-6431871/v1), 2025-05-19
Supplement: Supplementary file 1 [file dec6a2589064f38571de7e69.docx]

**Supplementary Table S1.** Patient characteristics between C-WBRT and HA-WBRT arms according to the APOE genotype

| APEO Genotype | **APOE ε3 homozygotes** | |  | **APOE ε2 Carriers** | |  | **APOE ε4 Carriers** | |  |
| --- | --- | --- | --- | --- | --- | --- | --- | --- | --- |
| Feature | HA-WBRT  *N* = 11 (%) | C-WBRT  *N* = 13 (%) | *p*-value | HA-WBRT  *N* = 5 (%) | C-WBRT  *N* = 6 (%) | *p*-value | HA-WBRT  *N* = 4 (%) | C-WBRT  *N* = 3 (%) | *p*-value |
| **Age** (mean, years old) | 58.1 | 59.2 | 0.73 | 57.4 | 57.2 | 0.97 | 57.8 | 61.0 | 0.52 |
| **Sex** |  |  | 1.00 |  |  | 1.00 |  |  | 0.48 |
| Male | 5 (45.5) | 6 (46.2) |  | 2 (40) | 2 (33.3) |  | 3 (75) | 1 (33.3) |  |
| Female | 6 (54.5) | 7 (53.8) |  | 3(60) | 4 (66.7) |  | 1 (25) | 2 (66.7) |  |
| **KPS** (median) | 90 | 90 | 0.33 | 90 | 90 | 0.43 | 80 | 80 | 0.63 |
| **GPA** (median) | 2 | 1.5 | 0.87 | 1.5 | 1.0 | 0.54 | 1.5 | 0.5 | 0.23 |
| **Pre-treatment  neurological symptoms** |  |  | 0.66 |  |  | 0.18 |  |  | 0.43 |
| None | 7 (63.6) | 10 (76.9) |  | 3 (60) | 6 (100) |  | 2 (50) | 3 (100) |  |
| Minor | 4 (36.4) | 3 (23.1) |  | 2 (40) | 0 (0) |  | 2 (50) | 0 (0) |  |
| **Primary cancer** |  |  | 1.00 |  |  |  |  |  |  |
| Lung | 11 (100) | 12 (92.3) |  | 5 (100) | 6 (100) |  | 4 (100) | 3 (100) |  |
| Breast | 0 (0) | 1 (7.7) |  | 0 (0) | 0 (0) |  | 0 (0) | 0 (0) |  |
| **Highly educated** | 10 (90.9) | 10 (76.9) | 0.60 | 5 (100) | 6 (100) |  | 4 (100) | 3 (100) |  |

Abbreviations: APOE, Apolipoprotein E*; N*, numbers; C-WBRT, conformal whole brain radiotherapy; HA-WBRT, hippocampal avoidance whole brain radiotherapy; KPS, Karnofsky Performance Score; GPA, Graded Prognostic Assessment in brain metastases
